# Supplementary material for: Exploring the Potential of Oral Microbiome Biomarkers for Colorectal Cancer Diagnosis and Prognosis: A Systematic Review
Source: MDPI journal article supplement (doi:10.3390/microorganisms11061586), 2023-06-15
Supplement: s1 [file s1]

Filter ARTICLE

WOS

((TI=(colorectal cancer) OR TI=(colonic cancer)) AND (TS=(Periodontal pathogens) OR TS=(oral microbiota) OR TS=(oral microbiome))) – 69 results

By expanding the search:

((TI=(colorectal cancer) OR TI=(colonic cancer)) AND (ALL=(periodontal pathogens) OR ALL=(oral microbiota) OR ALL=(oral microbiome))) -81 results ( 10 se)

Science direct

colorectal cancer or colonic cancer and oral microbiota or oral microbiome or  
periodontal pathogens  
– 21 studies

scopus

TITLE ( colorectal AND cancer ) OR TITLE ( colonic AND cancer ) AND TITLE-ABS  
( periodontal AND pathogens ) OR TITLE-ABS ( oral AND microbiota ) OR TITLE-  
ABS ( oral AND microbiome ).  
– 52 studies

PubMed

((COLORECTAL CANCER[Title]) OR (COLONIC CANCER[Title])) AND ((PERIODONTAL  
PATHOGENS[Title/Abstract]) OR (ORAL MICROBIOME[Title/Abstract]) OR (ORAL  
MICROBIOTA[Title/Abstract]))  
-20 studies
