# Supplementary material for: Exploring the Potential of Oral Microbiome Biomarkers for Colorectal Cancer Diagnosis and Prognosis: A Systematic Review
Source: MDPI journal article supplement (doi:10.3390/microorganisms11061586), 2023-06-15
Supplement: s1 [file s1]

## BACTERIAL SPECIES

- 1.
2. bacterial abundance was higher in the CRC group :

phyla Fusobacteria and Bacteroidetes

the genera Fusobacterium, Prevotella, and Veillonella

the diagnostic value of the CRC oral microbiome -five OTU markers

g\_\_Cyanobacteria\_unclassified

g\_\_Veillonella

g\_\_Selenomonas

g\_\_Fusobacterium

g\_\_Gemella

2.

The 10 species significantly elevated in relative abundance within CRC :

Parvimonas micra (qvalue = 3.09e-09),

Peptostrepto- coccus stomatis (qvalue = 4.51e-08),

Gemella morbillorum (qvalue = 4.55e-08),

Fusobacterium nucleatum (qvalue = 1.08e-06),

Streptococcus anginosus (qvalue = 1.13e-03),

Dialister pneumosintes (qvalue=1.37e-03),

Peptostreptococcus anaerobius (qvalue = 4.74e-03),

Streptococcus sp. KCOM 2412 (Streptococcus periodonticum) (qvalue = 7.18e-03),

Ruminococcus torques (qvalue = 1.55e-02),

Filifactor alocis (qvalue = 2.85e-02)

The eight HPS unique to the CRC associated group :

Intestinibacillus massiliensis,

Prevotella copri,

Haemophilus parainfluenzae,

Ruminococcus bicirculans,

Streptococcus mitis,

Neglecta timonensis,

*Bifidobacterium catenulatum*

*Anaerostipes neopropionicum*.

3.

top three genera that were differentially abundant in the saliva of CRC patients vs. healthy controls :

*Eubacterium* spp., *Bifidobacterium* spp., and *Fusobacterium* spp

fecal microbiome in CRC and the HC showed a total of six genera, three of which are associated with HC fecal and three with CRC fecal.

CRC fecal samples : genera *Ruminococcus-torques*-group, *Granulicatella*, and *Ruminococcus-gaurei*-group.

4.

The 10 most abundant bacterial genera across all oral swab

*Streptococcus* (30.7% of all assigned reads), *Haemophilus* (14.2%), *Neisseria* (8.8%), *Prevotella* (6.6%), *Fusobacterium* (5.4%), *Veillonella* (5.4%), *Leptotrichia* (3.9%), *Rothia* (3.9%), *Actinomyces* (2.9%) and *Porphyromonas* (2.4%)

17 OTUs that were shared between the oral cavity and CRC and polyp samples;

The two tumour-associated bacterial coabundance groups (CAGs) eg, *F. nucleatum*, *Parvimonas micra*, *Peptostreptococcus stomatis*, *Dialister pneumosintes* and - oral pathogen CAG and comprising seven OTUs in total. The second CAG :

*Actinomyces*, *Haemophilus*, *Rothia*, *Streptococcus* and *Veillonella* spp.,<sup>34</sup> genera also associated with relatively healthy tooth pockets<sup>32</sup> (so-called biofilm CAG; 10 OTUs)

5.

the saliva of CRC patients : The relative abundance of *Bacteroides*, *Streptococcus* and *Desulfovibrio* genera was increased; level of *Porphyromonas gingivalis* was significantly elevated in CRC patients (Mann-Whitney U test P value = .013)

Firmicutes and *Bacteroides* in the mucosa microbiome were more abundant in CRC

CRC was dominated by type II oral-type: overabundance of *Streptococcus*, *Neisseria*, *Porphyromonas*, *Prevotella* and *Haemophilus* genus.

CRC group was mainly dominated by type III enterotype, which was represented by *Fusobacterium*, *Bacteroides*, *Streptococcus* and *Peptostreptococcus*.

*Fusobacterium* genus in CRC were higher than those in HC. These OTUs mainly belonged to *Fusobacterium mortiferum*, *Fusobacterium varium*, *Fusobacterium periodonticum* and unclassified *Fusobacterium*. The relative abundance of OTU 2327 assigned to *Fusobacterium mortiferum*, was more abundant in the stool of the CRC group

6.

ORAL CRC: *Treponema denticola* and *Prevotella intermedia* p <0.05

Phylum Actinobacteria

|                                       |        |        |                  |                       |      |
|---------------------------------------|--------|--------|------------------|-----------------------|------|
| Family Bifidobacteriaceae             | 0.09%  | 0.05%  | 1.10 (1.01–1.19) | 0.03                  | 1.00 |
| Phylum Bacteroidetes                  |        |        |                  |                       |      |
| Species Prevotella denticola          | 0.14%  | 0.07%  | 1.11 (1.02–1.20) | 0.02                  | 1.00 |
| Species Prevotella melaninogenica     | 2.03%  | 2.12%  | 0.91 (0.84–0.99) | 0.04                  | 1.00 |
| Species Prevotella sp. oral taxon 300 | 0.04%  | 0.02%  | 1.13 (1.01–1.26) | 0.04                  | 1.00 |
| Phylum Firmicutes                     |        |        |                  |                       |      |
| Family Carnobacteriaceae              | 1.22%  | 1.39%  | 0.85 (0.72–0.99) | 0.04                  | 1.00 |
| Family Streptococcaceae               | 33.45% | 36.23% | 0.73 (0.56–0.96) | 0.02                  | 1.00 |
| Genus Streptococcus                   | 33.40% | 35.92% | 0.73 (0.55–0.96) | 0.02                  | 1.00 |
| Species S. sp. oral taxon 058         | 16.66% | 18.59% | 0.79 (0.67–0.94) | $7.87 \times 10^{-3}$ | 0.42 |
| Family Erysipelotrichaceae            | 0.09%  | 0.09%  | 0.87 (0.76–0.99) | 0.04                  | 1.00 |
| Genus Solobacterium                   | 0.07%  | 0.07%  | 0.87 (0.76–0.98) | 0.02                  | 1.00 |
| Species S. moorei                     | 0.07%  | 0.07%  | 0.87 (0.77–0.99) | 0.03                  | 1.00 |

|                                       |        |        |                  |      |      |
|---------------------------------------|--------|--------|------------------|------|------|
| Phylum Actinobacteria                 |        |        |                  |      |      |
| Species Bifidobacterium dentium       | 58.87% | 50.54% | 1.46 (1.04–2.07) | 0.03 | 1.00 |
| Phylum Bacteroidetes                  |        |        |                  |      |      |
| Species Prevotella sp. oral taxon 304 | 33.77% | 26.03% | 1.59 (1.09–2.33) | 0.02 | 1.00 |
| Phylum Firmicutes                     |        |        |                  |      |      |
| Genus Peptococcus                     | 60.61% | 52.06% | 1.46 (1.02–2.08) | 0.04 | 1.00 |
| Genus Anaeroglobus                    | 69.70% | 60.74% | 1.48 (1.04–2.10) | 0.03 | 1.00 |
| Genus Mitsuokella                     | 44.16% | 36.01% | 1.52 (1.08–2.14) | 0.02 | 1.00 |

|                                                 |        |        |                  |                       |      |
|-------------------------------------------------|--------|--------|------------------|-----------------------|------|
| Species <i>Lactobacillus salivarius</i>         | 46.75% | 38.18% | 1.46 (1.03–2.08) | 0.03                  | 1.00 |
| Species <i>Eubacterium yurii</i>                | 37.66% | 29.93% | 1.46 (1.01–2.10) | 0.04                  | 1.00 |
| Phylum Proteobacteria                           |        |        |                  |                       |      |
| Family Burkholderiaceae                         | 66.67% | 55.97% | 1.62 (1.14–2.30) | $7.40 \times 10^{-3}$ | 0.68 |
| Genus <i>Lautropia</i>                          | 66.23% | 54.45% | 1.72 (1.20–2.45) | $2.88 \times 10^{-3}$ | 0.26 |
| Species <i>Neisseria oralis</i>                 | 42.42% | 34.71% | 1.42 (1.01–2.00) | 0.04                  | 1.00 |
| Species <i>Campylobacter</i> sp. oral taxon 044 | 51.52% | 42.08% | 1.58 (1.12–2.24) | 0.01                  | 0.92 |
| Phylum Spirochaetes                             |        |        |                  |                       |      |
| Species <i>Treponema lecithinolyticum</i>       | 44.59% | 33.62% | 1.76 (1.23–2.53) | $2.11 \times 10^{-3}$ | 0.19 |
| Species <i>Treponema</i> sp. oral taxon 250     | 25.97% | 20.17% | 1.66 (1.07–2.56) | 0.02                  | 1.00 |
| Phylum SR1                                      | 54.98% | 41.65% | 1.76 (1.25–2.47) | $1.09 \times 10^{-3}$ | 0.10 |
| Species SR1_[G-1] sp. oral taxon 345            | 33.77% | 26.90% | 1.50 (1.01–2.23) | 0.04                  | 1.00 |
| Species SR1_[G-1] sp. oral taxon 874            | 41.13% | 29.07% | 1.75 (1.24–2.48) | $1.58 \times 10^{-3}$ | 0.14 |

7. Idrissi Janati A, Karp I, Von Renteln D, Bouin M, Liu Y, Tran SD, Emami E

*F. nucleatum* in saliva from both case and control groups,

*F. nucleatum* in colorectal mucosa LOW in the controls, and it was even lower in the cases.

8. *F. nucleatum* positivity was detected in 44 (8.6%) of the 511 Japanese patients with colorectal cancer

9. *Peptostreptococcus stomatis*, *Streptococcus anginosus*, *Solobacterium moorei*, and *Streptococcus koreensis*, - saliva and stool of patients with CRC

10.

three main bacterial phyla : Firmicutes (39.18%), Bacteroidetes (30.36%), and Proteobacteria (10.65%)

CT - Proteobacteria, Bacteroidetes, and Firmicutes).

saliva : Actinobacteria, Saccharibacteria, Proteobacteria (Beta class), Fusobacteria, Firmicutes (mainly Negativicutes and Bacilli), and Bacteroidetes (exclusively represented by members of Flavobacteriia class and Prevotellaceae family)

stool : Bacteroidetes (in particular the Bacteroidia class) and Firmicutes (mainly Clostridia and Erysipelotrichia classes)

biopsy Proteobacteria, mainly Delta, Alpha, and Gamma classes, Planctomycetes, and Firmicutes (namely Lachnospiraceae family and Clostridiales family XI), enriched in members of Fusobacterium genus

11.

of Fn was detected in both the oral cavity and matched cancer tissue and adjacent non-neoplastic mucosa. Pg present in the oral cavity

12.

bacteria of putative oral origin overabundant in the tumour microbiomes:

Gemella

Peptostreptococcus,

F. nucleatum,

Leptotrichia,

Selenomonas sputigena

Campylobacter rectus

WGS- F. nucleatum high in advanced CRC stages p-value < 0.05

13.

Fn DNA was increased in the saliva of the CRC

14.

Saliva - Fn ( $p = 0.001$ ) and Sg ( $p < 0.001$ ) compared with controls.

Fn : 69 of 71 cases (97.2%) in the patient group

74 of 77 subjects (96.1%) in the control group ( $p > 0.99$ )

Mean Fn amount was higher in patient saliva samples compared with controls  $p = 0.001$

Sg :22 of 71 patients (31%)

21 of 77 controls (27.3%)

The amount of Sg was found to have diagnostic value  $p < 0.001$

Pg was detected in 54 patients (76.1%) and 58 controls (75.3%).
